# Supplementary material for: GhostConv+CA-YOLOv8n: a lightweight network for rice pest detection based on the aggregation of low-level features in real-world complex backgrounds
Source: Frontiers journal article supplement (doi:10.3389/fpls.2025.1620339), 2025-08-13
Supplement: Data_Sheet_6.pdf [file Data_Sheet_6.pdf]

| Labels<br>Models |                   |             |             |                   |                       |                |                   |                   |
|------------------|--------------------------------------------------------------------------------------------------|--------------------------------------------------------------------------------------------|--------------------------------------------------------------------------------------------|---------------------------------------------------------------------------------------------------|--------------------------------------------------------------------------------------------------------|-------------------------------------------------------------------------------------------------|----------------------------------------------------------------------------------------------------|----------------------------------------------------------------------------------------------------|
| Ours             | <br>60%         | <br>100%  | <br>90%   | <br>90%,90%     | <br>80%,90%         | <br>80%      | <br>90%         | <br>90%         |
| Yolov10          | <br>40%         | <br>100%  | <br>80%   | <br>90%,90%     | <br>80%,90%         | <br>80%      | <br>70%,80%     | <br>90%         |
| Yolov9           | <br>No object   | <br>90%   | <br>80%   | <br>80%,90%     | <br>40%,80%         | <br>90%      | <br>50%         | <br>90%         |
| Yolov7x          | <br>30%         | <br>90%   | <br>80%   | <br>90%,90%,70% | <br>40%,60%,70%,90% | <br>90%      | <br>40%,60%     | <br>40%,60%,80% |
| Yolov6           | <br>40%         | <br>90%   | <br>80%   | <br>90%,90%     | <br>30%,90%,90%     | <br>90%      | <br>70%,80%     | <br>90%         |
| Yolov5           | <br>No object  | <br>90%  | <br>60%  | <br>70%,80%    | <br>40%,50%,80%    | <br>30%,60% | <br>50%        | <br>90%        |
| Yolov3           | <br>No object | <br>90% | <br>80% | <br>90%,90%   | <br>70%,80%       | <br>90%    | <br>No object | <br>90%       |
